# Supplementary material
Source: PubMed Central journal article supplement (PMC3406385)
Supplement: tjp0590-2977-SD1.pdf [file tjp0590-2977-SD1.pdf]

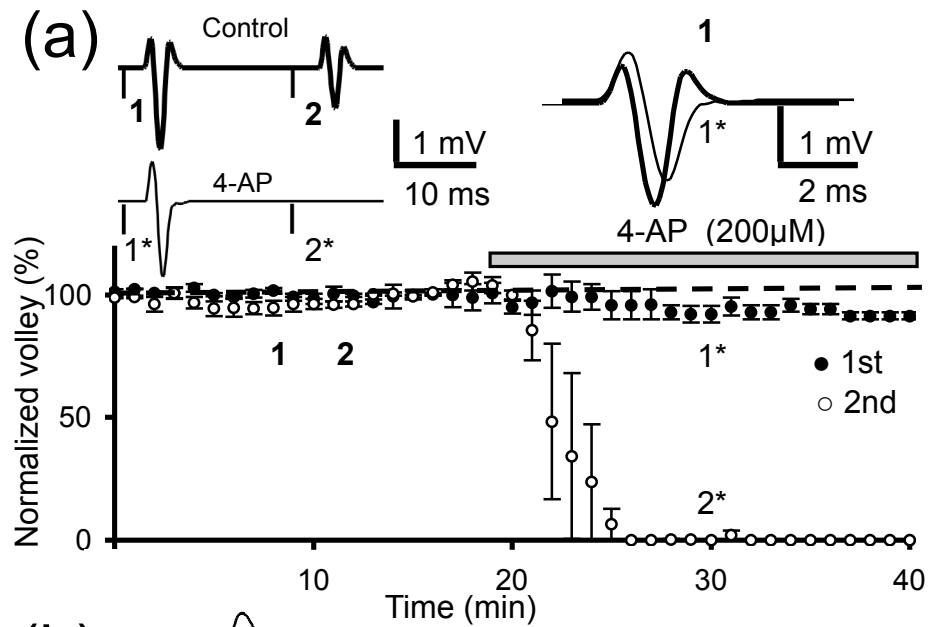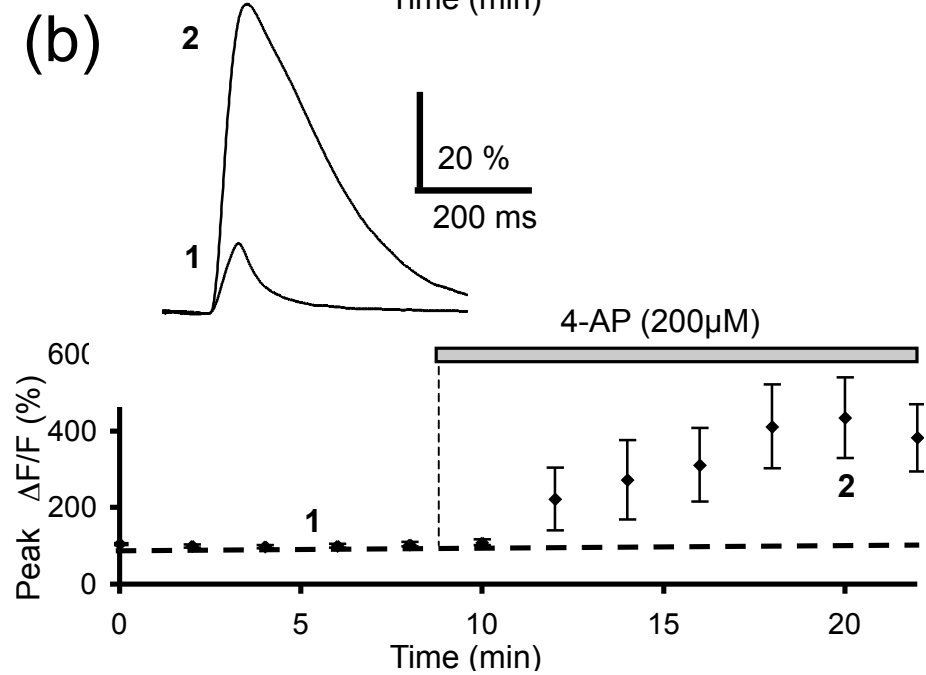

Supplementary figure 1

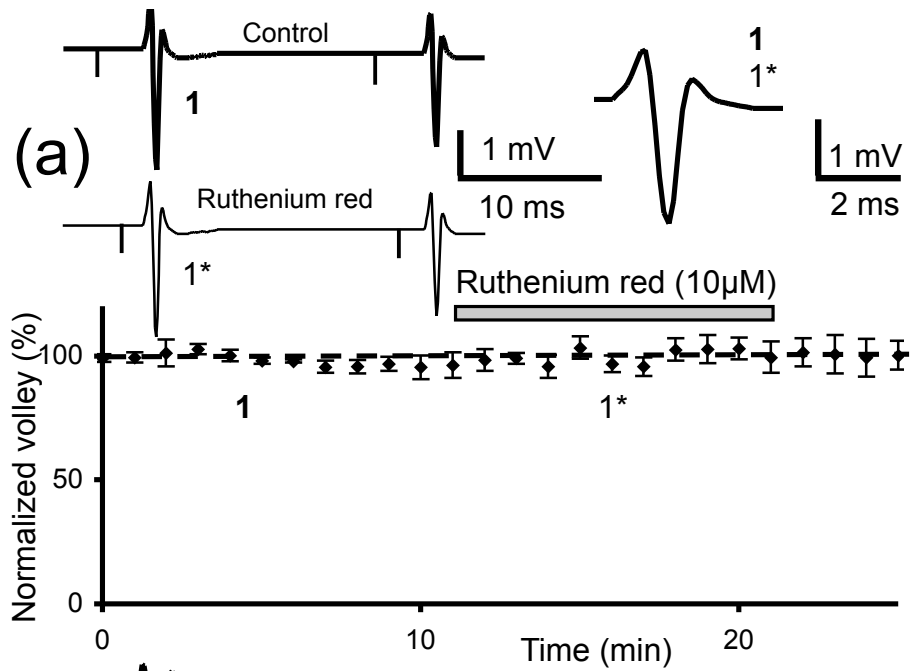

Supplementary figure 2

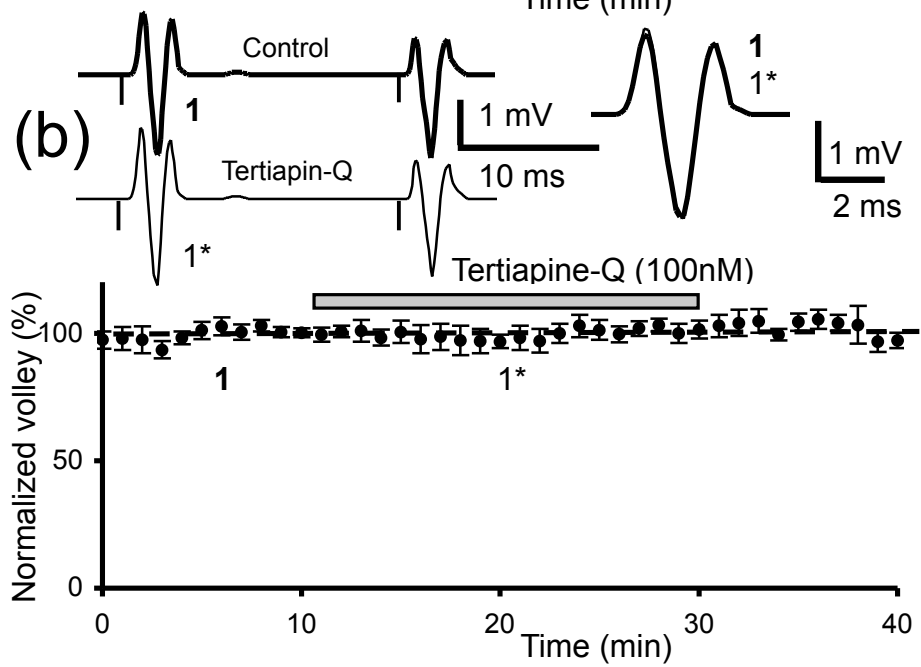

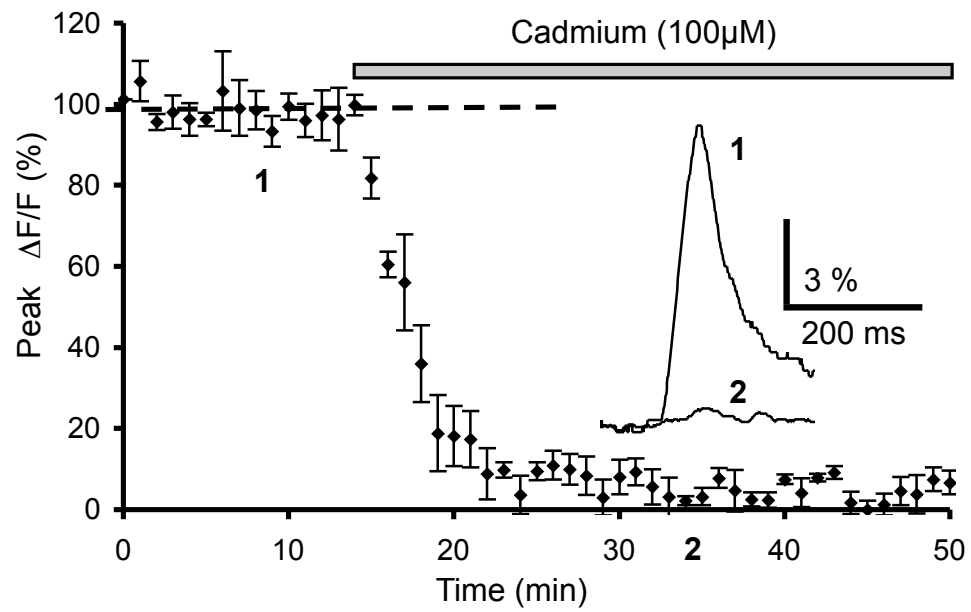

Supplementary figure 3

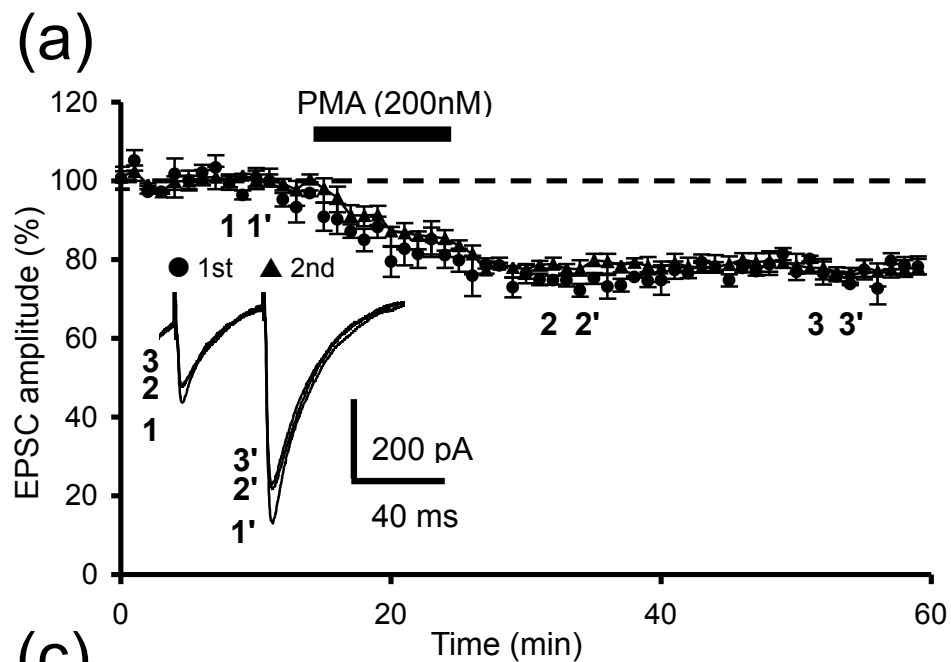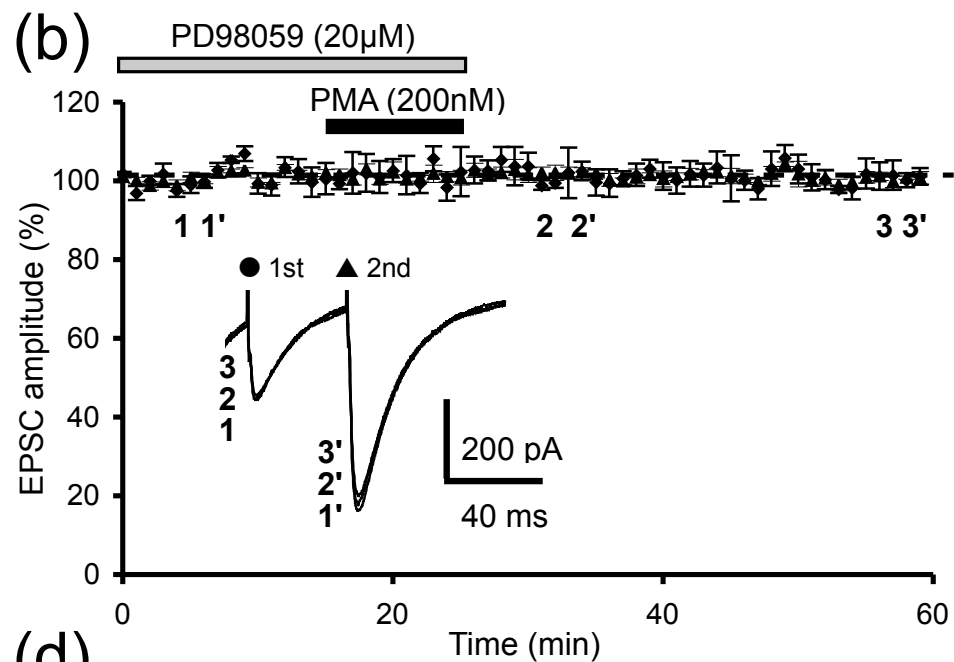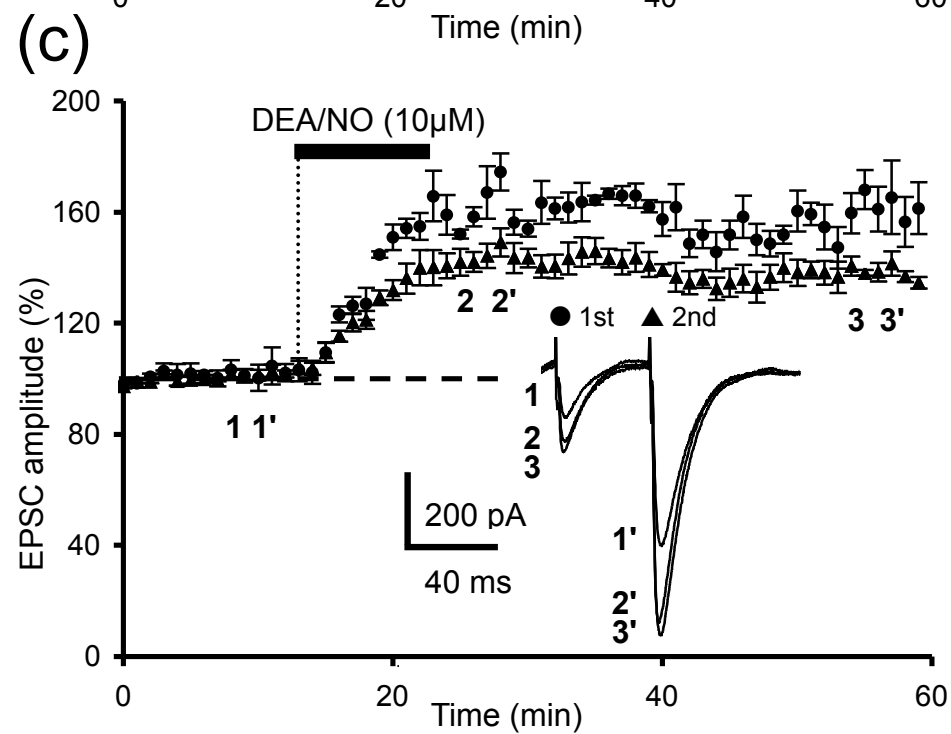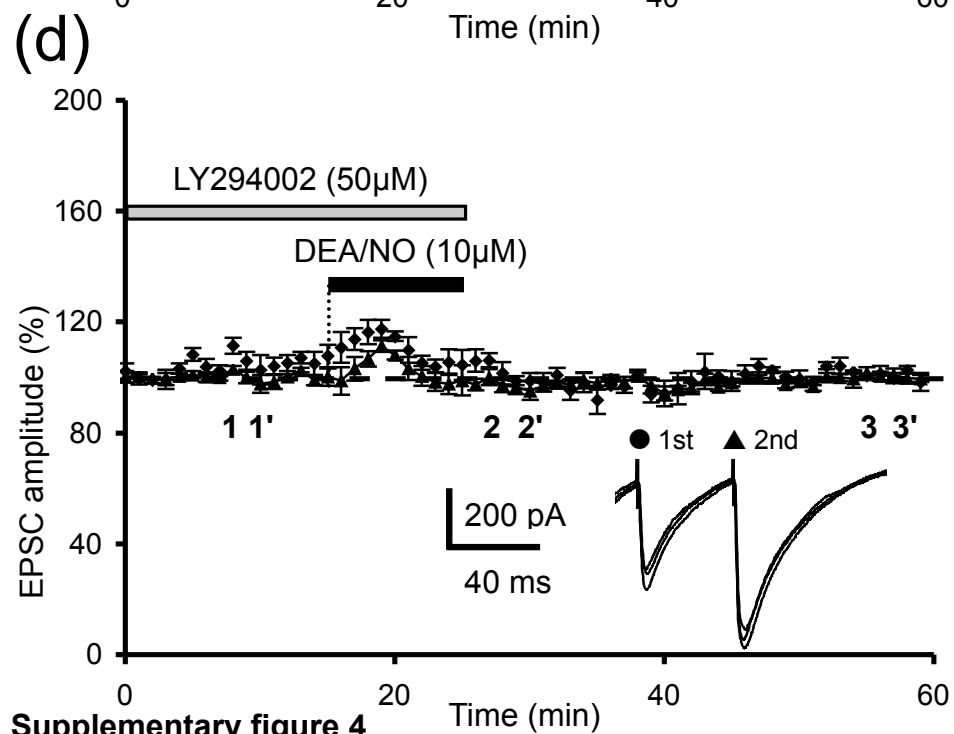

Supplementary figure 4

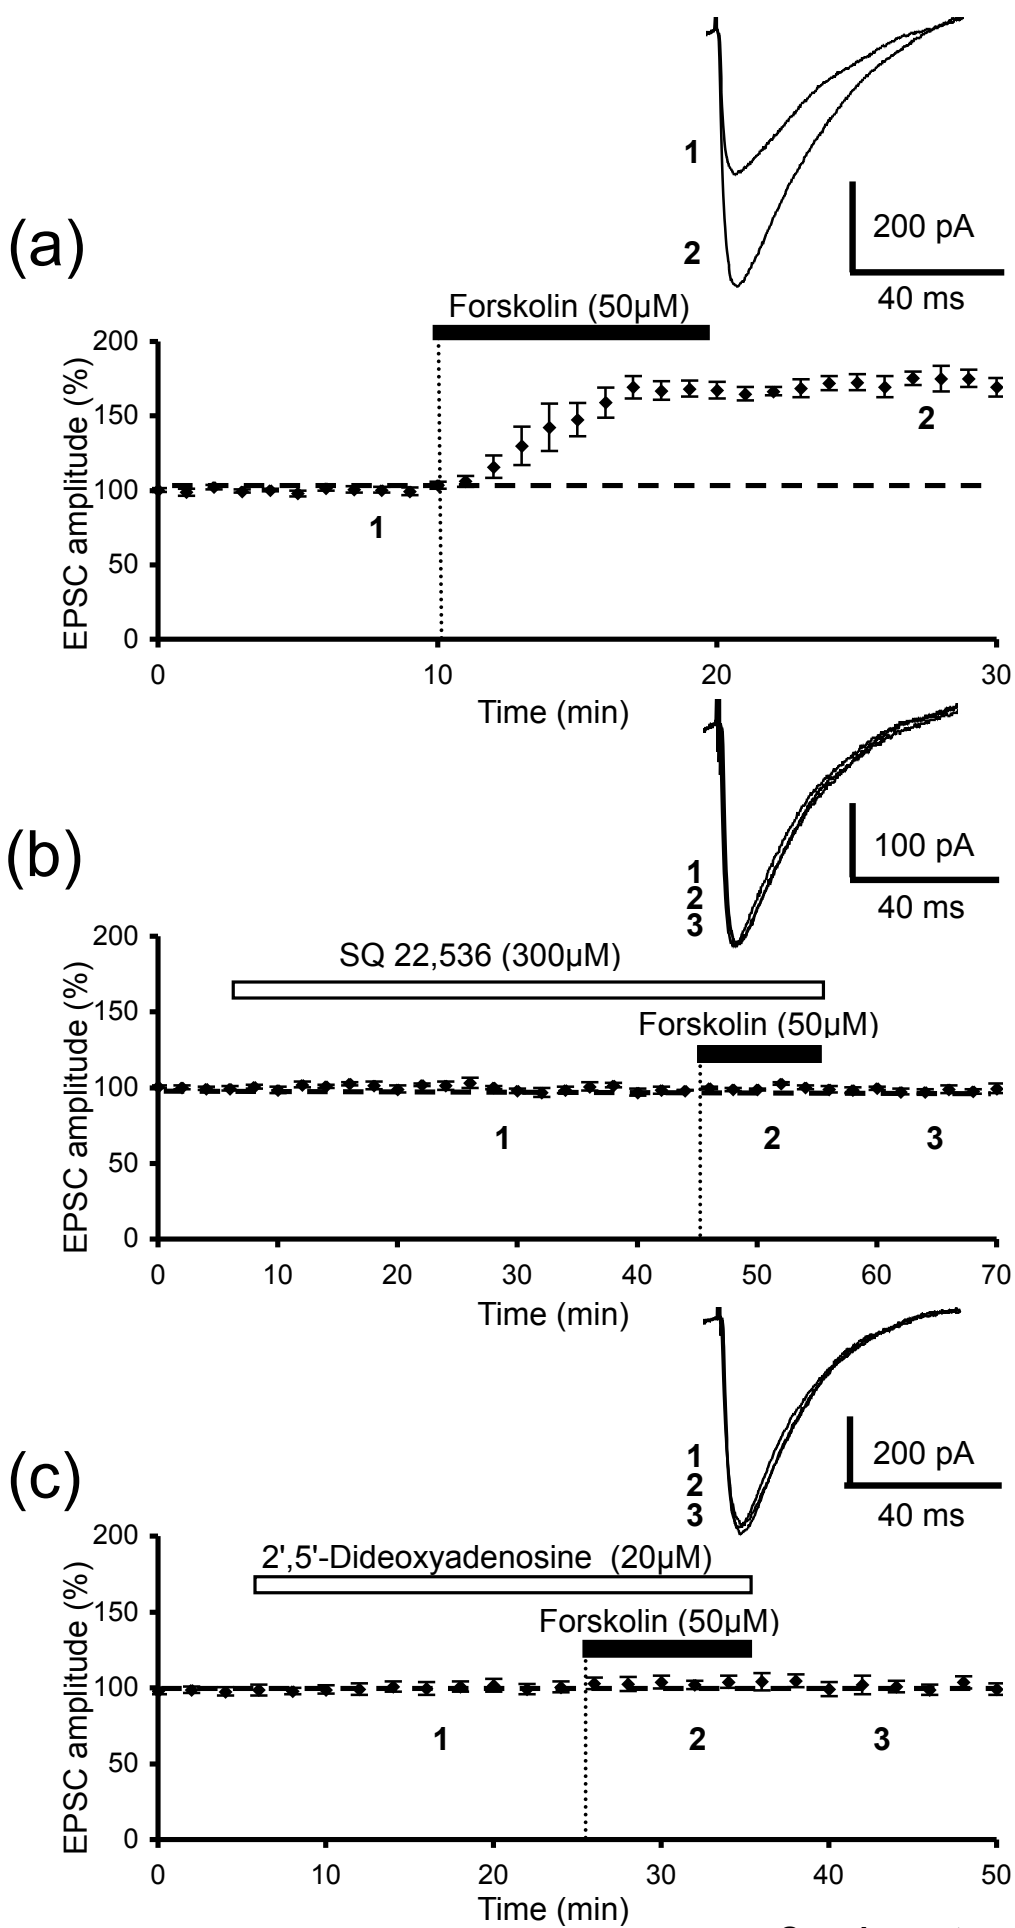

Supplementary figure 5
